# Supplementary material for: Random copolymer gels of N-isopropylacrylamide and N-ethylacrylamide: effect of synthesis solvent compositions on their properties
Source: Royal Society of Chemistry journal article supplement (doi:10.1039/c6ra27348c), 2017-01-01
Supplement: c6ra27348c1.pdf [file c6ra27348c1.pdf]

# Supplementary Information to

## Random Copolymers gels of *N*- isopropylacrylamide and *N*- ethylacrylamide: Effect of Synthesis Solvent Compositions on its Properties

---

*Qiao Wang*<sup>1</sup>, *Chandra Sekhar Biswas*<sup>1,2</sup>, *Massimiliano Galluzzi*<sup>1,2</sup>, *Yuhang Wu*<sup>1</sup>,  
*Bing Du*<sup>1\*</sup>, *Florian. J. Stadler*<sup>1\*</sup>

<sup>1</sup>College of Materials Science and Engineering, Shenzhen Key Laboratory of Polymer Science and Technology, Guangdong Research Center for Interfacial Engineering of Functional Materials, Nanshan District Key Lab for Biopolymers and Safety Evaluation, Shenzhen University, Shenzhen 518060, P. R. China

<sup>2</sup>College of Optoelectronic Engineering, Shenzhen University, Shenzhen 518060, P. R. China

\*Corresponding Author Email: [dubing@szu.edu.cn](mailto:dubing@szu.edu.cn), [fjstadler@szu.edu.cn](mailto:fjstadler@szu.edu.cn)

## Elemental analysis

Elemental analysis of the dry gels is done on a VARIO EL cube machine (Elementar, Germany) under oxygen and helium using dynamic combustion method. The results are shown in Figure SI

1.

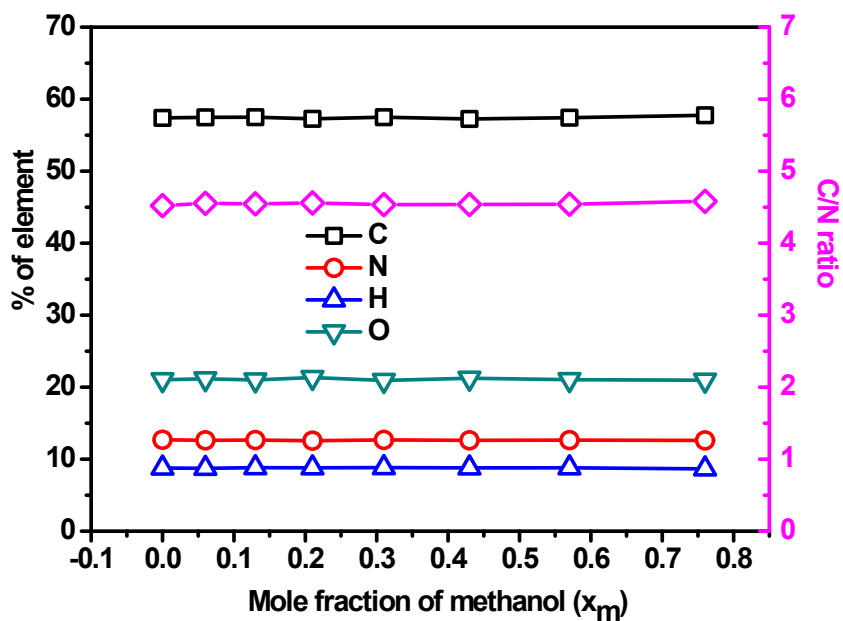

Figure SI1. Comparison of elemental analysis of different elements in the gels.

## BET analysis.

BET analysis is done on ASAP 2020 analyzer (Micromeritics instrument) using freeze dried gels under liquid nitrogen at  $-195\text{ }^{\circ}\text{C}$ . Prior to the analysis, the samples were evacuated at  $250\text{ }^{\circ}\text{C}$  for 4 h.

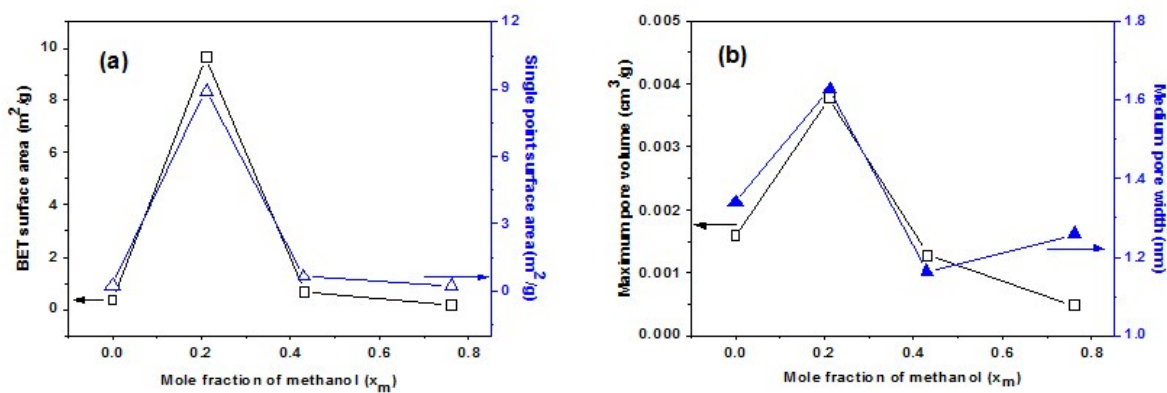

**Figure S12.** Comparison of (a) BET surface area and (b) pore volume of the gels synthesized at different solvent compositions.

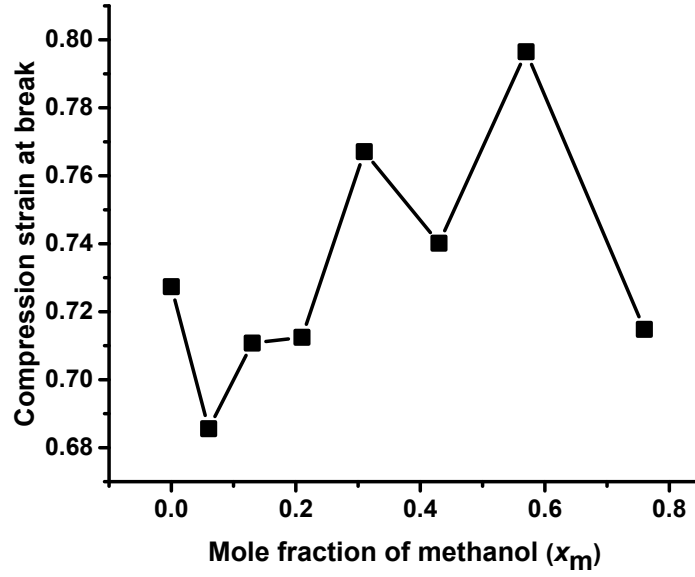

Figure SI3. Comparison of compression strain at break with  $x_m$  value.

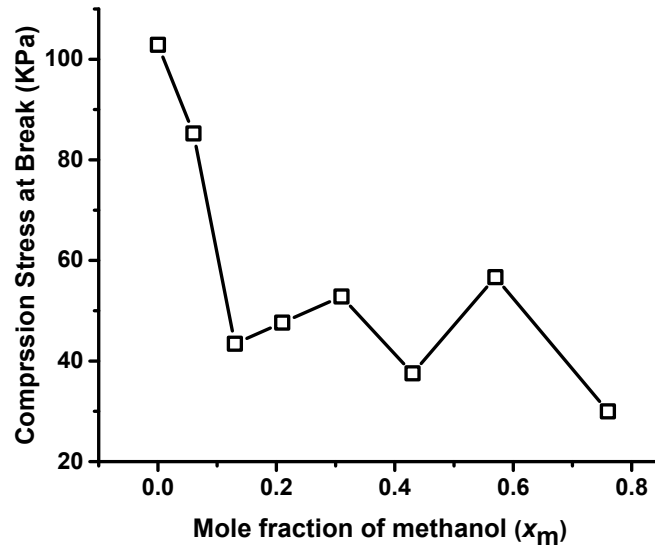

Figure SI4. Comparison of compression stress at break with  $x_m$  value.

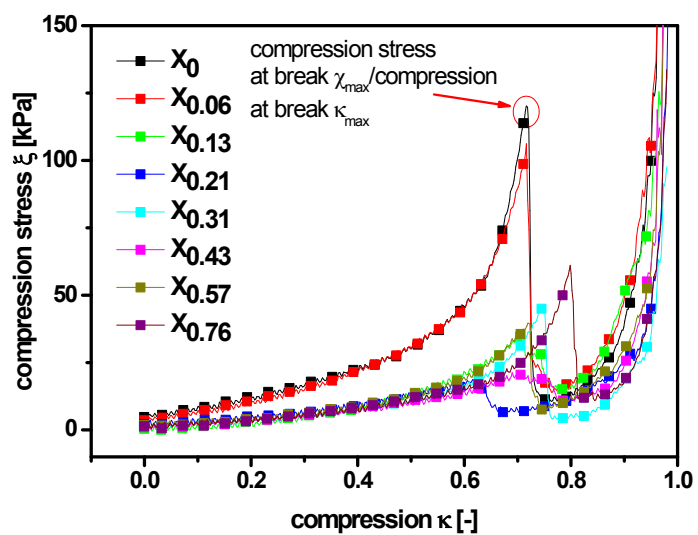

Fig. S15. Compression strain of the gels as function of  $\chi$ .

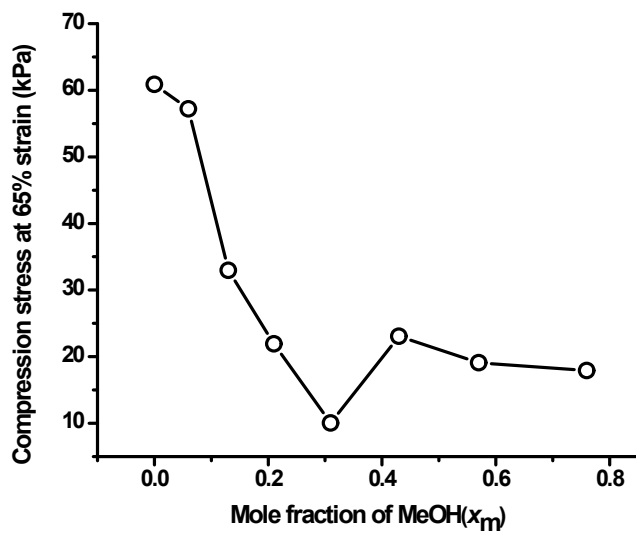

Figure S16. Comparison of compression stress at at 65% strain with  $x_m$  value.
